# Supplementary material for: Analysis of Peripheral Blood Mononuclear Cells Gene Expression Highlights the Role of Extracellular Vesicles in the Immune Response following Hematopoietic Stem Cell Transplantation in Children
Source: MDPI journal article supplement (doi:10.3390/genes12122008), 2021-12-17
Supplement: s1 [file s1]

**Table S1.** Results of laboratory analysis in children with HSCT procedure.

| Parameter      | Pre-HSCT, <i>n</i> = 27 | Post-HSCT, <i>n</i> = 27 | <i>p</i> / <i>p</i> <sup>BH</sup> -Value<br>Pre-HSCT vs.<br>Post-HSCT |
|----------------|-------------------------|--------------------------|-----------------------------------------------------------------------|
| Glc (mmol/L)   | 4.4 ± 0.6               | 4.5 ± 0.6                | 0.7/-                                                                 |
| TC (mmol/L)    | 3.3 ± 1.0               | 3.9 ± 0.9                | 0.002/0.04                                                            |
| HDL-C (mmol/L) | 1.0 ± 0.4               | 1.3 ± 0.5                | 0.02/0.4                                                              |
| LDL-C (mmol/L) | 1.4 ± 0.9               | 1.9 ± 0.8                | 0.05/-                                                                |
| TG (mmol/L)    | 1.8 ± 0.7               | 1.5 ± 0.6                | 0.3/-                                                                 |
| hsCRP (mg/L)   | 7.7 ± 10.4              | 7.0 ± 11.2               | 0.8/-                                                                 |

**Table S2.** The genes which expression changed most significantly after the HSCT procedure (as presented in Table 5). The groups of children with non-neoplastic and neoplastic disease as an indication for HSCT were considered separately here. The gene expression is shown as log<sub>2</sub> of signal RMA-normalized intensity.

| Gene symbol                                                               | Locus and Affimetrix code | Non-neoplastic           |                           | Pre-HSCT vs post-HSCT |                                          | Neoplastic                |                            | Pre-HSCT vs post-HSCT |                                          |
|---------------------------------------------------------------------------|---------------------------|--------------------------|---------------------------|-----------------------|------------------------------------------|---------------------------|----------------------------|-----------------------|------------------------------------------|
|                                                                           |                           | Pre-HSCT<br><i>n</i> = 9 | Post-HSCT<br><i>n</i> = 9 | <i>FC</i>             | <i>p</i> / <i>p</i> <sup>BH</sup> -Value | Pre-HSCT<br><i>n</i> = 18 | Post-HSCT<br><i>n</i> = 18 | <i>FC</i>             | <i>p</i> / <i>p</i> <sup>BH</sup> -Value |
| The most statistically significantly changed genes (FDR <0.05) after HSCT |                           |                          |                           |                       |                                          |                           |                            |                       |                                          |
| <i>DPP4</i>                                                               | 2q24.2<br>8056222         | 9.18                     | 8.05                      | -2.18                 | 0.0009/0.3                               | 8.81                      | 7.71                       | -2.15                 | 8*10 <sup>-6</sup> /0.02                 |
| <i>SLC4A10</i>                                                            | 2q24.2<br>8045974         | 6.19                     | 6.41                      | 1.16                  | 0.06/0.6                                 | 7.03                      | 6.55                       | -1.40                 | 0.002/0.1                                |
| <i>NR3C2</i>                                                              | 4q31<br>8103094           | 6.71                     | 5.69                      | -2.03                 | 10 <sup>-6</sup> /0.032                  | 6.18                      | 5.71                       | -1.38                 | 0.01/0.2                                 |
| <i>AK5</i>                                                                | 1p31.1<br>7902452         | 7.55                     | 5.73                      | -3.53                 | 0.001/0.3                                | 6.88                      | 5.79                       | -2.14                 | 0.002/0.1                                |
| The genes which expression was most decreased after the HSCT procedure    |                           |                          |                           |                       |                                          |                           |                            |                       |                                          |
| <i>AHSP</i>                                                               | 16p11.2<br>7995237        | 9.11                     | 6.75                      | -5.15                 | 0.07/0.6                                 | 9.53                      | 7.41                       | -4.34                 | 0.0005/0.08                              |
| <i>CA1</i>                                                                | 8q21.2<br>8151592         | 10.47                    | 7.61                      | -7.26                 | 0.08/0.7                                 | 10.24                     | 8.02                       | -4.64                 | 0.002/0.1                                |
| <i>ALAS2</i>                                                              | Xp11.21<br>8173135        | 9.73                     | 7.25                      | -5.60                 | 0.08/0.7                                 | 9.97                      | 8.13                       | -3.57                 | 0.003/0.1                                |
| The genes which expression was most increased after the HSCT procedure    |                           |                          |                           |                       |                                          |                           |                            |                       |                                          |
| <i>MS4A1</i>                                                              | 11q12.2<br>7940287        | 9.04                     | 9.2                       | 1.1                   | 0.1/0.7                                  | 4.89                      | 5.09                       | 1.15                  | 0.02/0.3                                 |
| <i>TCL1A</i>                                                              | 14q32.13<br>7981183       | 10.48                    | 10.44                     | -1.03                 | 0.6/0.9                                  | 7.44                      | 10.03                      | 6.02                  | 3*10 <sup>-5</sup> /0.033                |
| <i>CD22</i>                                                               | 19q13.12<br>8027837       | 9.96                     | 10.24                     | 1.22                  | 0.4/0.8                                  | 6.01                      | 8.73                       | 6.6                   | 9*10 <sup>-7</sup> /0.009                |

**Table S3.** Table showing the analysis of GO enrichment from DEGs between children before and after performing the HSCT procedure.

| Category | Term                                | Genes count ( <i>n</i> , %) | <i>p</i> -Value       | <i>p</i> <sup>BH</sup> -Value |
|----------|-------------------------------------|-----------------------------|-----------------------|-------------------------------|
| CC       | blood microparticle                 | 18, 10.8%                   | 2.2*10 <sup>-17</sup> | 2.5*10 <sup>-15</sup>         |
|          | external side of plasma membrane    | 17, 10.2%                   | 1.2*10 <sup>-13</sup> | 6.8*10 <sup>-12</sup>         |
|          | extracellular region                | 33, 19.8%                   | 3.7*10 <sup>-10</sup> | 1.5*10 <sup>-8</sup>          |
|          | immunoglobulin complex, circulating | 7, 4.2%                     | 9.1*10 <sup>-10</sup> | 2.7*10 <sup>-8</sup>          |
|          | plasma membrane                     | 52, 31.1%                   | 9.9*10 <sup>-9</sup>  | 2.3*10 <sup>-7</sup>          |
|          | extracellular exosome               | 39, 23.4%                   | 2.5*10 <sup>-7</sup>  | 4.8*10 <sup>-6</sup>          |
|          | hemoglobin complex                  | 4, 2.4%                     | 4.2*10 <sup>-5</sup>  | 7.0*10 <sup>-4</sup>          |

|    |                                                              |           |                       |                       |
|----|--------------------------------------------------------------|-----------|-----------------------|-----------------------|
|    | secretory dimeric IgA immunoglobulin complex                 | 3, 1.8%   | 1.0*10 <sup>-4</sup>  | 1.2*10 <sup>-3</sup>  |
|    | secretory IgA immunoglobulin complex                         | 3, 1.8%   | 1.0*10 <sup>-4</sup>  | 1.2*10 <sup>-3</sup>  |
|    | monomeric IgA immunoglobulin complex                         | 3, 1.8%   | 1.0*10 <sup>-4</sup>  | 1.2*10 <sup>-3</sup>  |
|    | extracellular space                                          | 19, 11.4% | 8.2*10 <sup>-4</sup>  | 8.7*10 <sup>-3</sup>  |
|    | hexameric IgM immunoglobulin complex                         | 2, 1.2%   | 1.2*10 <sup>-2</sup>  | 1.1*10 <sup>-1</sup>  |
|    | pentameric IgM immunoglobulin complex                        | 2, 1.2%   | 1.2*10 <sup>-2</sup>  | 1.1*10 <sup>-1</sup>  |
|    | B cell receptor complex                                      | 2, 1.2%   | 1.2*10 <sup>-2</sup>  | 1.1*10 <sup>-1</sup>  |
|    | integral component of plasma membrane                        | 16, 9.6%  | 1.8*10 <sup>-2</sup>  | 1.4*10 <sup>-1</sup>  |
|    | membrane raft                                                | 5, 3.0%   | 3.3*10 <sup>-2</sup>  | 2.4*10 <sup>-1</sup>  |
|    | integral component of membrane                               | 39, 23.4% | 6.3*10 <sup>-2</sup>  | 4.4*10 <sup>-1</sup>  |
| MF | antigen binding                                              | 25, 15.0% | 2.9*10 <sup>-32</sup> | 5.9*10 <sup>-30</sup> |
|    | immunoglobulin receptor binding                              | 11, 6.6%  | 1.8*10 <sup>-16</sup> | 1.9*10 <sup>-14</sup> |
|    | serine-type endopeptidase activity                           | 20, 12.0% | 6.6*10 <sup>-16</sup> | 4.6*10 <sup>-14</sup> |
|    | oxygen transporter activity                                  | 3, 1.8%   | 3.1*10 <sup>-3</sup>  | 1.6*10 <sup>-1</sup>  |
|    | heme binding                                                 | 5, 3.0%   | 9.2*10 <sup>-3</sup>  | 3.8*10 <sup>-1</sup>  |
|    | interleukin-8 receptor activity                              | 2, 1.2%   | 1.2*10 <sup>-2</sup>  | 4.1*10 <sup>-1</sup>  |
|    | interleukin-8 binding                                        | 2, 1.2%   | 1.8*10 <sup>-2</sup>  | 5.3*10 <sup>-1</sup>  |
|    | oxygen binding                                               | 3, 1.8%   | 3.2*10 <sup>-2</sup>  | 8.4*10 <sup>-1</sup>  |
|    | anion transmembrane transporter activity                     | 2, 1.2%   | 5.3*10 <sup>-2</sup>  | 1.0                   |
|    | peptidoglycan binding                                        | 2, 1.2%   | 7.0*10 <sup>-2</sup>  | 1.0                   |
|    | FMN binding                                                  | 2, 1.2%   | 8.6*10 <sup>-2</sup>  | 1.0                   |
|    | C2H2 zinc finger domain binding                              | 2, 1.2%   | 8.6*10 <sup>-2</sup>  | 1.0                   |
|    | complement activation, classical pathway                     | 24, 14.4% | 1.6*10 <sup>-30</sup> | 1.0*10 <sup>-27</sup> |
| BP | complement activation                                        | 19, 11.4% | 5.1*10 <sup>-23</sup> | 1.7*10 <sup>-20</sup> |
|    | Fc-gamma receptor signaling pathway involved in phagocytosis | 19, 11.4% | 7.1*10 <sup>-20</sup> | 1.6*10 <sup>-17</sup> |
|    | receptor-mediated endocytosis                                | 19, 11.4% | 7.6*10 <sup>-17</sup> | 1.2*10 <sup>-14</sup> |
|    | B cell receptor signaling pathway                            | 13, 7.8%  | 4.5*10 <sup>-16</sup> | 5.9*10 <sup>-14</sup> |
|    | immune response                                              | 24, 14.4% | 9.3*10 <sup>-16</sup> | 1.0*10 <sup>-13</sup> |
|    | positive regulation of B cell activation                     | 10, 6.0%  | 2.7*10 <sup>-14</sup> | 2.5*10 <sup>-12</sup> |
|    | phagocytosis, recognition                                    | 10, 6.0%  | 5.9*10 <sup>-14</sup> | 4.9*10 <sup>-12</sup> |
|    | regulation of immune response                                | 16, 9.6%  | 2.8*10 <sup>-13</sup> | 2.0*10 <sup>-11</sup> |
|    | phagocytosis, engulfment                                     | 10, 6.0%  | 5.8*10 <sup>-13</sup> | 3.8*10 <sup>-11</sup> |
|    | Fc-epsilon receptor signaling pathway                        | 15, 9.0%  | 4.7*10 <sup>-12</sup> | 2.8*10 <sup>-10</sup> |
|    | proteolysis                                                  | 21, 12.6% | 2.6*10 <sup>-11</sup> | 1.4*10 <sup>-9</sup>  |
|    | adaptive immune response                                     | 8, 4.8%   | 3.7*10 <sup>-5</sup>  | 1.9*10 <sup>-3</sup>  |
|    | innate immune response                                       | 12, 7.2%  | 7.2*10 <sup>-5</sup>  | 3.4*10 <sup>-3</sup>  |
|    | defense response to bacterium                                | 7, 4.2%   | 2.8*10 <sup>-4</sup>  | 1.2*10 <sup>-2</sup>  |
|    | positive regulation of respiratory burst                     | 3, 1.8%   | 5.6*10 <sup>-4</sup>  | 2.3*10 <sup>-2</sup>  |
|    | glomerular filtration                                        | 3, 1.8%   | 1.3*10 <sup>-3</sup>  | 5.1*10 <sup>-2</sup>  |
|    | retina homeostasis                                           | 4, 2.4%   | 1.9*10 <sup>-3</sup>  | 7.1*10 <sup>-2</sup>  |
|    | antibacterial humoral response                               | 4, 2.4%   | 2.5*10 <sup>-3</sup>  | 8.8*10 <sup>-2</sup>  |
|    | oxygen transport                                             | 3, 1.8%   | 3.8*10 <sup>-3</sup>  | 1.2*10 <sup>-1</sup>  |
|    | dendritic cell chemotaxis                                    | 3, 1.8%   | 4.9*10 <sup>-3</sup>  | 1.5*10 <sup>-1</sup>  |
|    | regulation of catalytic activity                             | 4, 2.4%   | 8.0*10 <sup>-3</sup>  | 2.3*10 <sup>-1</sup>  |
|    | cellular response to cytokine stimulus                       | 3, 1.8%   | 8.1*10 <sup>-3</sup>  | 2.3*10 <sup>-1</sup>  |
|    | interleukin-8-mediated signaling pathway                     | 2, 1.2%   | 1.2*10 <sup>-2</sup>  | 3.4*10 <sup>-1</sup>  |
|    | B cell proliferation                                         | 3, 1.8%   | 1.7*10 <sup>-2</sup>  | 3.4*10 <sup>-1</sup>  |
|    | receptor internalization                                     | 3, 1.8%   | 2.9*10 <sup>-2</sup>  | 7.2*10 <sup>-1</sup>  |
|    | bicarbonate transport                                        | 3, 1.8%   | 3.0*10 <sup>-2</sup>  | 7.2*10 <sup>-1</sup>  |

|                                                |         |                      |                      |
|------------------------------------------------|---------|----------------------|----------------------|
| inflammatory response                          | 7, 4.2% | 3.0*10 <sup>-2</sup> | 7.2*10 <sup>-1</sup> |
| hemoglobin metabolic process                   | 2, 1.2% | 3.7*10 <sup>-2</sup> | 8.3*10 <sup>-1</sup> |
| chemotaxis                                     | 4, 2.4% | 4.0*10 <sup>-2</sup> | 8.7*10 <sup>-1</sup> |
| sensory perception of pain                     | 3, 1.8% | 4.1*10 <sup>-2</sup> | 8.7*10 <sup>-1</sup> |
| cellular response to organic cyclic compound   | 3, 1.8% | 5.2*10 <sup>-2</sup> | 1.0                  |
| purine nucleotide metabolic process            | 2, 1.2% | 6.0*10 <sup>-2</sup> | 1.0                  |
| locomotory exploration behaviour               | 2, 1.2% | 7.2*10 <sup>-2</sup> | 1.0                  |
| positive regulation of cell-cell adhesion      | 2, 1.2% | 7.2*10 <sup>-2</sup> | 1.0                  |
| oxidation-reduction process                    | 8, 4.8% | 7.5*10 <sup>-2</sup> | 1.0                  |
| homeostasis of number of cells                 | 2, 1.2% | 7.8*10 <sup>-2</sup> | 1.0                  |
| response to lipopolysaccharide                 | 4, 2.4% | 8.2*10 <sup>-2</sup> | 1.0                  |
| positive regulation of protein oligomerization | 2, 1.2% | 8.3*10 <sup>-2</sup> | 1.0                  |
| carbohydrate metabolic process                 | 4, 2.4% | 9.4*10 <sup>-2</sup> | 1.0                  |
